# Supplementary material
Source: PubMed Central journal article supplement (PMC4825741)

Supplemental Figure 1: Dynamic DEK association with mitotic chromosomes is detectable by multiple DEK antibodies

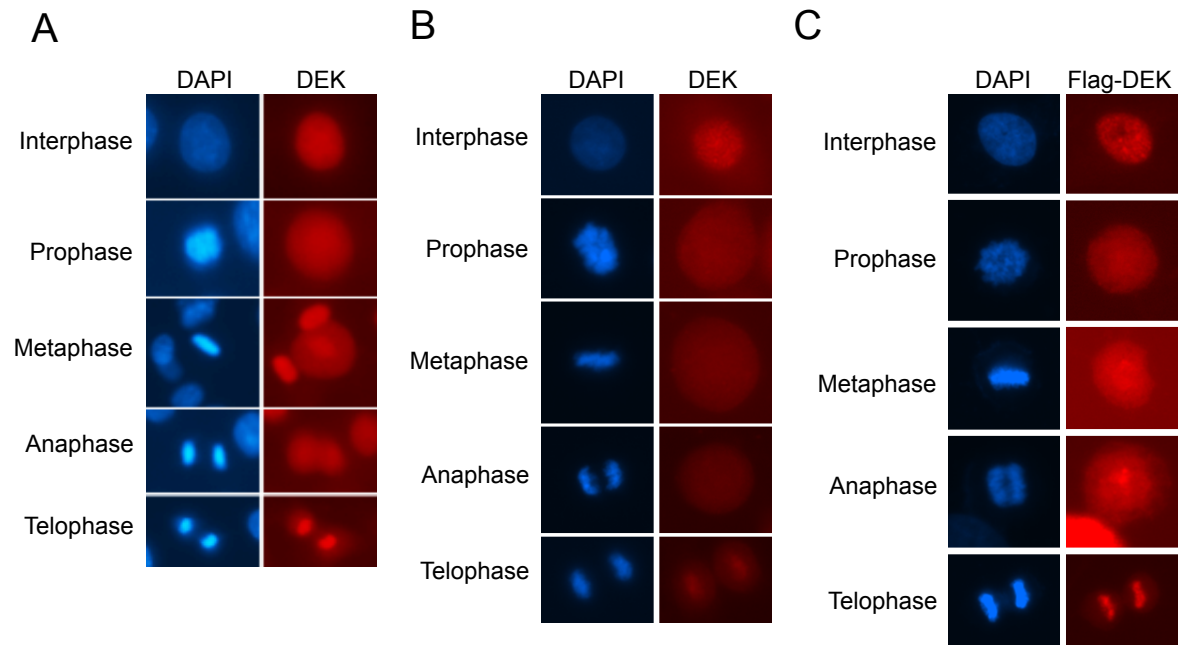

Supplemental Figure 2: DEK protein level in DEK over-expressing NIKS is similar to that in cancer cells

A

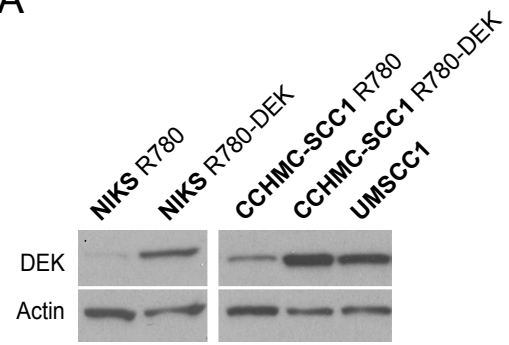

Supplemental Figure 3: DEK-GFP bound to chromatin is detected by DEK antibodies and on lagging chromosomes

A

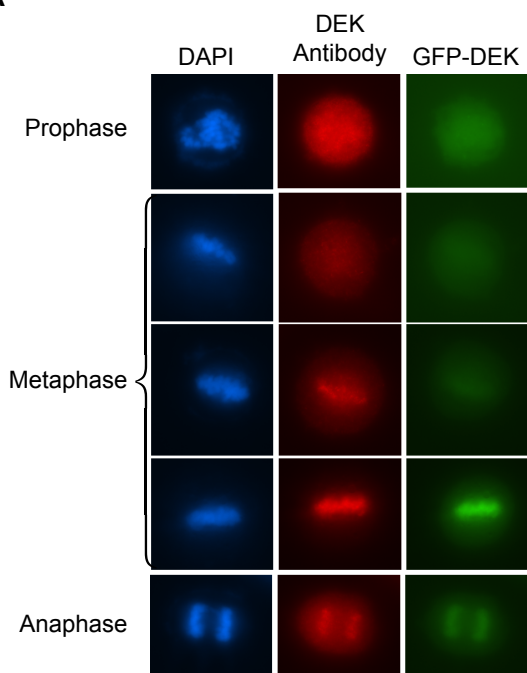

B

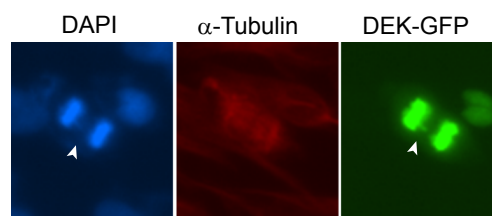

Supplemental Figure 4: DEK associates with lagging chromatin in DEK<sup>Hi</sup> expressing Dek<sup>-/-</sup> MEFS

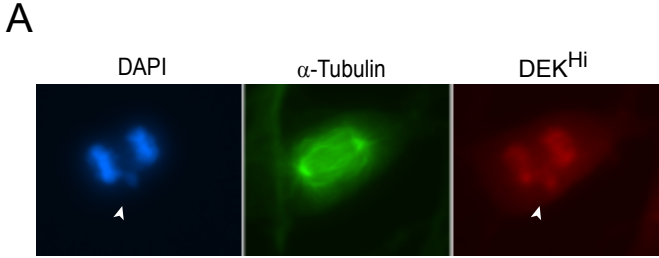

Figure 5: An inducible GFP-DEK fusion mimics endogenous DEK localization in mitosis and induces micronuclei formation.

A

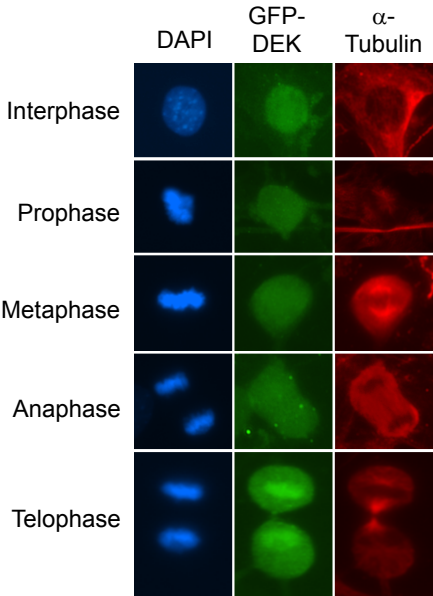

B

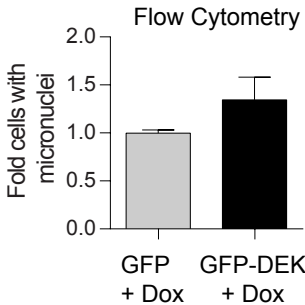

Supplemental Figure 6: Effects of DEK over-expression compared to that of an aneugen and a clastogen on micronucleus formation

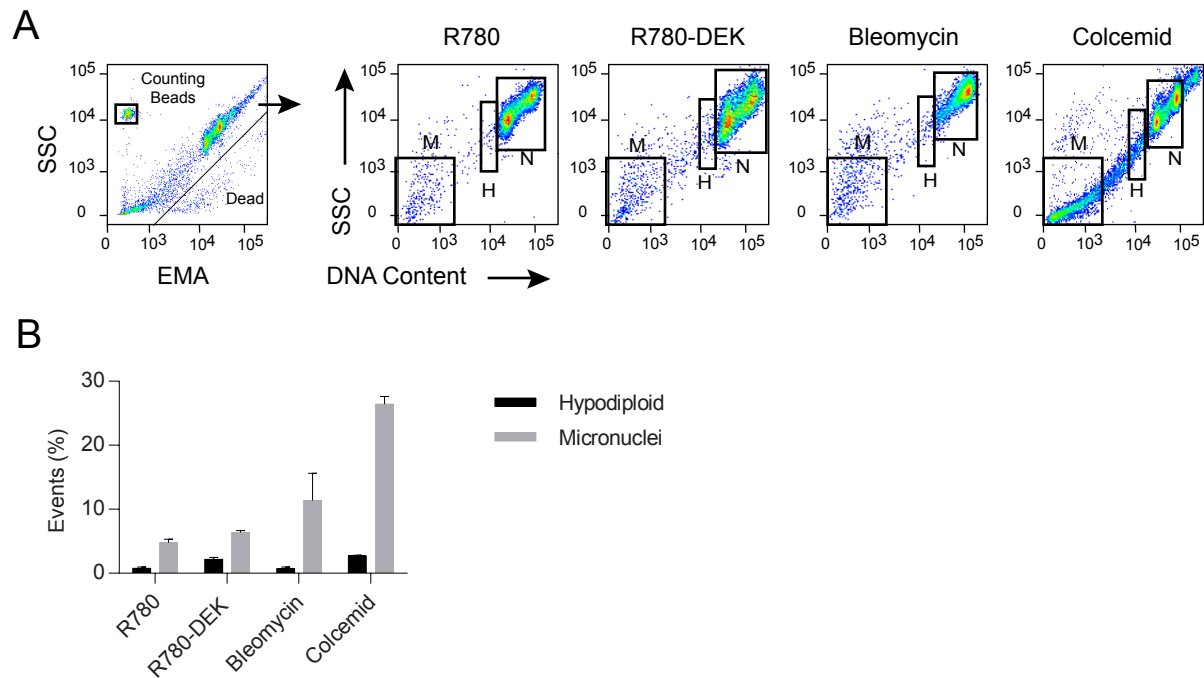

Supplement: kccy-14-24-1044177-s001.pdf [file kccy-14-24-1044177-s001.pdf]
